# Supplementary material
Source: PubMed Central journal article supplement (PMC6457216)
Supplement: ba027482-suppl1.pdf [file ba027482-suppl1.pdf]

**Supplementary Figure S1: VJ gene usage.** **A.** Peripheral blood mononuclear cells (MF5 PBMC) sample was used for whole exome capture and sequenced at a maximum depth of 400 million reads. Sequenced samples were analyzed for V and J gene combination and no preferential combination was identified as oppose to the high frequency VJ combination identified in **(B)** that can be associated with presence of dominant clone in a MF5\_1T sample. **(C)** VJ gene usage of MF5\_2P.

**Supplementary Figure S2: Correlation of inverse Simpson index and dominant clone frequency against tumor enrichment.** Microdissected island containing atypical lymphoma cells were subjected to WES/WTS. **(A)** Inverse Simpson index reflects the TCR repertoire richness. **(B)** Indicates the most frequent most clonotype for TCR $\alpha$ , - $\beta$  and - $\gamma$ . Proportion of tumor-derived DNA in the sample was calculated based on copy number aberration analysis from WES. Symbols represent values for individual samples.

**Supplementary Figure S3: Shared T-cell clonotypes:** Identified CDR3 sequences using whole exome sequencing (WES) were tested for overlap. Heatmaps representing the shared clonotypes in the 33 MF samples **(A)** TCR $\alpha$  **(B)** TCR $\beta$  and **(C)** TCR $\gamma$  clonotypes. The overlap represent the contamination from reactive T-cells along with the malignant clonotypes.

**Supplementary Figure S4. VJ gene usage for top 10 high frequency clonotypes identified using WES in top 10 dominant clones.** The samples correspond to those in Fig 3.

**Supplementary Figure S5. VJ gene usage for top 10 high frequency clonotypes identified using WTS in top 10 dominant clones.** The samples correspond to those in Fig 3.

**Supplementary Table S1.** Samples included in the study, with patient age, sex and diagnosis.

**Supplementary Table S2.** Number of clonotypes identified by WES (DNA) and WTS (RNA) in patients with MF. Samples are annotated as patient number (see Fig 1) with the suffix P (plaque), T (tumor) or PB (peripheral blood mononuclear cells). Normal Lymphocytes are pooled CD4+ cells from 4 healthy donors.

**Supplementary Table S3.** Percentage of tumor DNA purity and dominant clone frequency for TCR- $\alpha$ , - $\beta$  or - $\gamma$  listed. Samples annotated as patient number followed by P for plaque and T for tumor (see figure 2B).

Supplementary Figure 1:

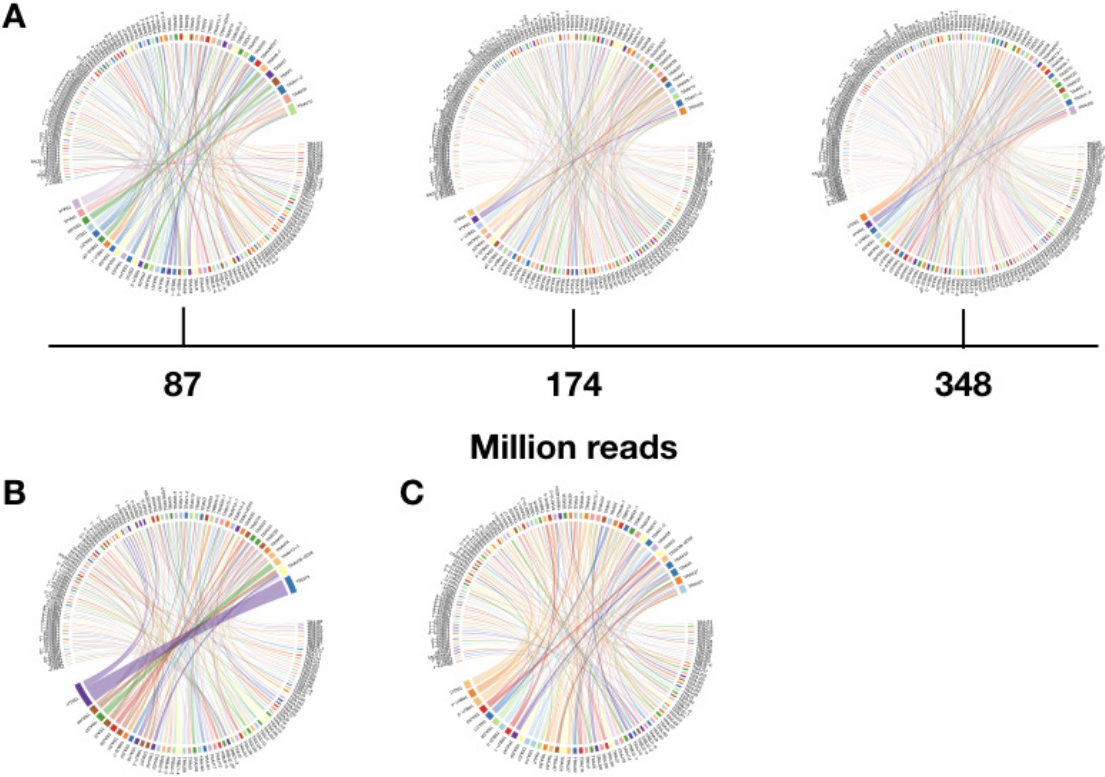

## Supplementary Figure 2:

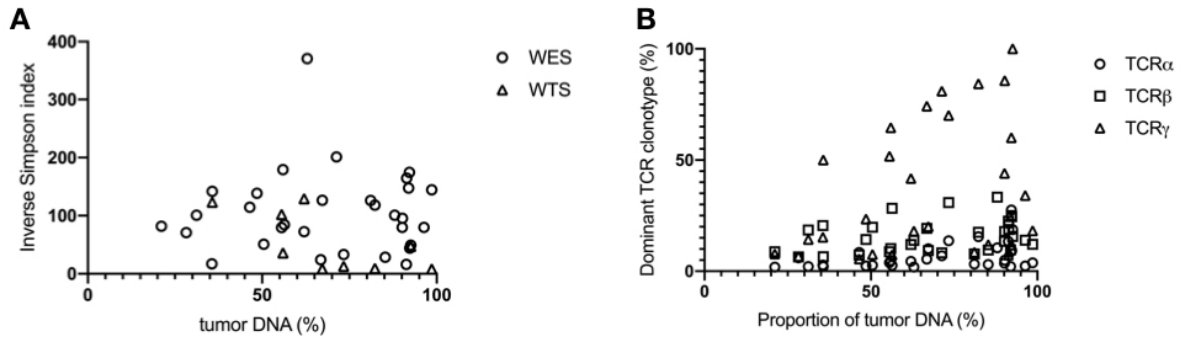

## Supplementary Figure 3:

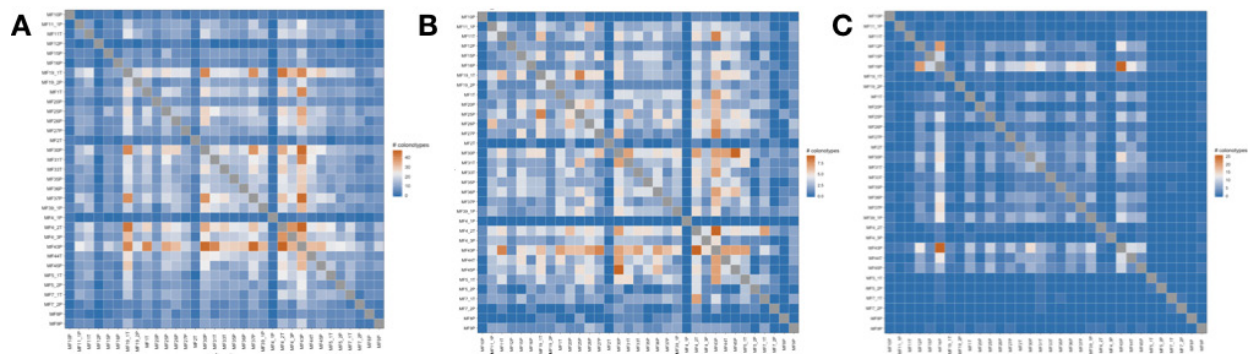

Supplementary Figure 4:

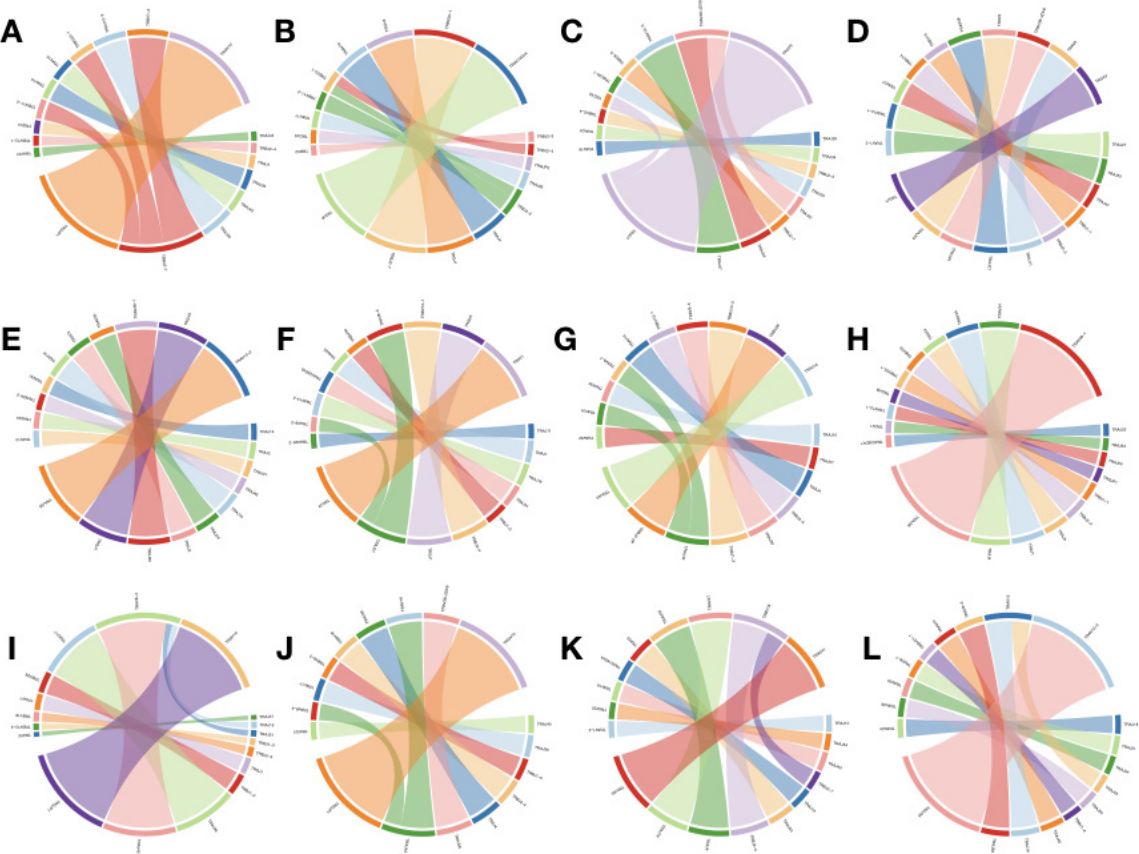

Supplementary Figure 5:

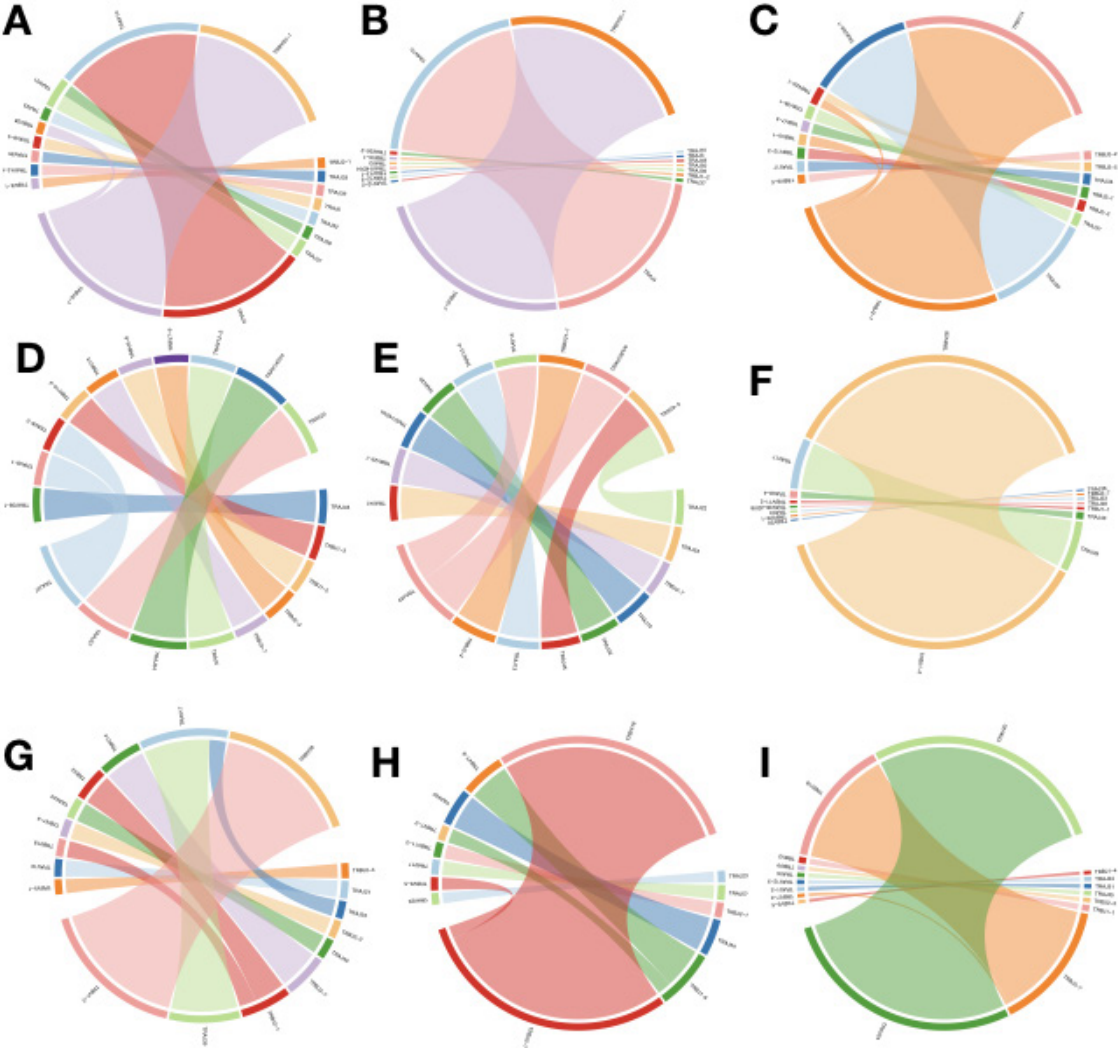

**Supplementary Table 1:**

| <b>Patient ID (age [years], sex [M-male, F-female])</b> | <b>Sample ID</b> | <b>Lesion type</b> | <b>Diagnosis and stage</b>             |
|---------------------------------------------------------|------------------|--------------------|----------------------------------------|
| MF1 (78, F)                                             | MF1T             | Tumor              | Mycosis Fungoides IIB                  |
| MF2 (83, M)                                             | MF2T             | Tumor              | Mycosis Fungoides IIB                  |
| MF4 (69, M)                                             | MF4_1P           | Plaque             | Mycosis Fungoides IIB                  |
|                                                         | MF4_2T           | Tumor              |                                        |
|                                                         | MF4_3P           | Plaque             |                                        |
| MF5 (44, F)                                             | MF5_1T           | Tumor              | Folliculotropic Mycosis Fungoides IIB  |
|                                                         | MF5_2P           | Plaque             |                                        |
| MF7 (62, M)                                             | MF7_1T           | Tumor              | Mycosis Fungoides IVA                  |
|                                                         | MF7_2P           | Plaque             |                                        |
| MF8 (54, F)                                             | MF8P             | Plaque             | Folliculotropic Mycosis Fungoides IIIB |
| MF9 (42, F)                                             | MF9P             | Plaque             | Mycosis Fungoides IA                   |
| MF10 (56, M)                                            | MF10P            | Plaque             | Mycosis Fungoides IB                   |
| MF11 (56, M)                                            | MF11T            | Tumor              | Mycosis Fungoides IIB                  |
|                                                         | MF11_1P          | Plaque             |                                        |
| MF12 (66, M)                                            | MF12P            | Plaque             | Mycosis Fungoides IVA                  |
| MF15 (65, M)                                            | MF15P            | Plaque             | Mycosis Fungoides IB                   |
| MF16 (68, M)                                            | MF16P            | Plaque             | Mycosis Fungoides IB                   |

|              |         |        |                                       |
|--------------|---------|--------|---------------------------------------|
| MF19 (74, M) | MF19_1T | Tumor  | Mycosis Fungoides IIB                 |
|              | MF19_2P | Plaque |                                       |
| MF20 (70, M) | MF20P   | Plaque | Mycosis Fungoides IB                  |
| MF25 (48, F) | MF25P   | Plaque | Mycosis Fungoides IB                  |
| MF26 (76, M) | MF26P   | Plaque | Mycosis Fungoides IB                  |
| MF27 (71, M) | MF27P   | Plaque | Mycosis Fungoides IA                  |
| MF30 (62, M) | MF30P   | Plaque | Mycosis Fungoides IB                  |
| MF31 (67, M) | MF31T   | Tumor  | Folliculotropic Mycosis Fungoides IIB |
| MF33 (75, M) | MF33T   | Tumor  | Mycosis Fungoides IIB                 |
| MF35 (54, M) | MF35P   | Plaque | Folliculotropic Mycosis Fungoides IIB |
| MF36 (64, M) | MF36P   | Plaque | Mycosis Fungoides IA                  |
| MF37 (63, M) | MF37    |        | Mycosis Fungoides IIB                 |
| MF39 (71, M) | MF39_1P | Plaque | Mycosis Fungoides IB                  |
| MF43 (60, M) | MF43P   | Plaque | Folliculotropic Mycosis Fungoides IA  |
| MF44 (85, M) | MF44T   | Tumor  | Mycosis Fungoides IIB                 |
| MF45 (77, M) | MF45P   | Plaque | Mycosis Fungoides IIIA                |

**Supplementary Table 2:**

| Samples<br>(DNA) | Number of TCR clonotypes |             |              | Samples<br>(RNA)      | Number of TCR clonotypes |             |
|------------------|--------------------------|-------------|--------------|-----------------------|--------------------------|-------------|
|                  | TCR $\alpha$             | TCR $\beta$ | TCR $\gamma$ |                       | TCR $\alpha$             | TCR $\beta$ |
| MF1              | 165                      | 40          | 19           | MF4_2                 | 48                       | 24          |
| MF2              | 85                       | 20          | 25           | MF4_3                 | 86                       | 47          |
| MF4_1            | 37                       | 5           |              | MF5_1                 | 98                       | 148         |
| MF4_2            | 394                      | 95          | 15           | MF7_1                 | 21                       | 10          |
| MF4_3            | 279                      | 65          | 7            | MF7_2                 | 29                       | 21          |
| MF5_1            | 160                      | 41          | 8            | MF11                  | 12                       | 4           |
| MF5_2            | 143                      | 32          | 6            | MF11_1                | 179                      | 131         |
| MF7_1            | 172                      | 25          | 4            | MF19_1                | 6                        | 10          |
| MF7_2            | 89                       | 19          | 6            | MF19_2                | 134                      | 84          |
| MF8              | 127                      | 25          | 1            | Normal<br>Lymphocytes | 52                       | 204         |
| MF9              | 129                      | 27          | 2            |                       |                          |             |
| MF10             | 70                       | 21          | 2            |                       |                          |             |
| MF11             | 157                      | 45          | 3            |                       |                          |             |
| MF11_1           | 146                      | 45          | 8            |                       |                          |             |
| MF12             | 82                       | 31          | 51           |                       |                          |             |
| MF15             | 197                      | 67          | 25           |                       |                          |             |



|        |     |     |     |  |  |  |
|--------|-----|-----|-----|--|--|--|
| MF16   | 57  | 92  | 338 |  |  |  |
| MF19_1 | 375 | 82  | 15  |  |  |  |
| MF19_2 | 141 | 32  | 5   |  |  |  |
| MF20   | 132 | 40  | 8   |  |  |  |
| MF25   | 264 | 68  | 34  |  |  |  |
| MF26   | 175 | 46  | 23  |  |  |  |
| MF27   | 159 | 46  | 36  |  |  |  |
| MF30   | 285 | 81  | 85  |  |  |  |
| MF31   | 162 | 29  | 37  |  |  |  |
| MF33   | 158 | 29  | 31  |  |  |  |
| MF35   | 118 | 29  | 20  |  |  |  |
| MF36   | 121 | 45  | 42  |  |  |  |
| MF37   | 141 | 22  | 27  |  |  |  |
| MF39_1 | 141 | 42  | 56  |  |  |  |
| MF43   | 471 | 110 | 98  |  |  |  |
| MF44   | 145 | 37  | 36  |  |  |  |
| MF45   | 174 | 42  | 31  |  |  |  |

**Supplementary Table 3:**

| <b>Samples</b> | <b>Tumor DNA Purity (%)</b> | <b>Alpha (%)</b> | <b>Beta (%)</b> | <b>Gamma (%)</b> |
|----------------|-----------------------------|------------------|-----------------|------------------|
| MF2T           | 91.309                      | 13.36406         | 22.5            | 7.317073         |
| MF4_1P         | 87.97                       | 10.52632         | 33.33333        |                  |
| MF4_2T         | 66.79                       | 5.447471         | 19.33086        | 74.19355         |
| MF4_3P         | 73.37                       | 13.68209         | 30.89888        | 70               |
| MF5_1T         | 55.99                       | 4.8              | 10.16949        | 64.58333         |
| MF5_2P         | 35.67                       | 2.16216          | 6.521739        | 50               |
| MF7_1T         | 71.28                       | 6.959707         | 8.333333        | 80.95238         |
| MF7_2P         | 62.03                       | 4.477612         | 12              | 41.66667         |
| MF8P           | 92.58                       | 18.70861         | 15.625          | 100              |
| MF9P           | 90.17                       | 4.966887         | 17.91045        | 85.71429         |
| MF10P          | 92.18                       | 27.57009         | 25              | 60               |
| MF11T          | 82.29                       | 15.51724         | 17.56757        | 84.28571         |
| MF11_1P        | 55.58                       | 3.902439         | 8.823529        | 51.72414         |
| MF12P          | 91.39                       | 21.42857         | 18.81188        | 8.695652         |
| MF15P          | 91.96                       | 2.089552         | 9.6             | 11.76471         |
| MF16P          | 46.45                       | 8.417508         | 7.274969        | 5.55767          |
| MF19_1T        | 98.57                       | 3.76506          | 12.12121        | 18.18182         |
| MF19_2P        | 67.27                       | 10.08772         | 9.302326        | 20               |
| MF20P          | 90.16                       | 3.606557         | 13.43284        | 44               |

|         |        |          |          |          |
|---------|--------|----------|----------|----------|
| MF25P   | 85.27  | 3.052065 | 9.52381  | 11.9403  |
| MF26P   | 50.49  | 2.671756 | 19.82759 | 7.5      |
| MF27P   | 92.312 | 9.247312 | 24.51613 | 11.76471 |
| MF30P   | 62.89  | 1.912046 | 13.84615 | 18.01802 |
| MF31T   | 81.08  | 3.184713 | 7.792208 | 8.510638 |
| MF35P   | 31.22  | 2.12     | 18.52    | 14.29    |
| MF36P   | 28.24  | 6.06     | 6.49     | 6.67     |
| MF37P   | 48.53  | 2.41     | 14.29    | 23.44    |
| MF39_1P | 56.34  | 2.66     | 28.28    | 7.38     |
| MF43P   | 21.14  | 1.89243  | 8.810573 | 7.792208 |
| MF44T   | 35.59  | 2.766798 | 20.51282 | 15.27778 |
| MF45P   | 96.36  | 2.372881 | 13.95349 | 34.06593 |
